# Supplementary material
Source: PubMed Central journal article supplement (PMC1772036)
Supplement: brjopthal_88_3_331__1.pdf [file brjopthal_88_3_331__1.pdf]

The questionnaire

---

CATARACT INFORMED CONSENT SURVEY

To improve our care of people intending to have cataract surgery, we wish to find out what they most want to know prior to their operation. Thank you for completing this survey.

Your details: Male  Female  Age:\_\_\_\_

Is this to be your First  or Second  cataract operation?

Regarding the information given to you before the operation:

How important is it for you to know:

*(please circle)*

*Not Important/Very Important*

---

|                                                            |   |   |   |   |   |
|------------------------------------------------------------|---|---|---|---|---|
| 1 What a cataract is                                       | 1 | 2 | 3 | 4 | 5 |
| 2 What the cause of cataracts are                          | 1 | 2 | 3 | 4 | 5 |
| 3 What other treatment options there are besides surgery   | 1 | 2 | 3 | 4 | 5 |
| 4 What happens if I don't have the cataract operation      | 1 | 2 | 3 | 4 | 5 |
| 5 The chance of my vision improving after cataract surgery | 1 | 2 | 3 | 4 | 5 |
| 6 When my vision will improve                              | 1 | 2 | 3 | 4 | 5 |
| 7 The general nature of the cataract operation             | 1 | 2 | 3 | 4 | 5 |
| 8 The technical details of the cataract operation          | 1 | 2 | 3 | 4 | 5 |
| 9 Who will be performing the surgery                       | 1 | 2 | 3 | 4 | 5 |
| 10 Details of the anaesthetic                              | 1 | 2 | 3 | 4 | 5 |

Having a cataract operation carries with it the very

---

---

CATARACT INFORMED CONSENT SURVEY

To improve our care of people intending to have cataract surgery, we wish to find out what they most want to know prior to their operation. Thank you for completing this survey.

Your details: Male  Female  Age: \_\_\_\_

Is this to be your First  or Second  cataract operation?

Regarding the information given to you before the operation:

How important is it for you to know: *(please circle)*  
*Not Important/Very Important*

---

small risk of having complications causing loss of vision or blindness. How important is it for you to know:

|                                                         |   |   |   |   |   |
|---------------------------------------------------------|---|---|---|---|---|
| 11 The overall risk of losing vision from the operation | 1 | 2 | 3 | 4 | 5 |
| 12 The types of serious complications                   | 1 | 2 | 3 | 4 | 5 |
| 13 All the complications both serious and minor         | 1 | 2 | 3 | 4 | 5 |

Should you be warned of a serious complication if it has a risk of happening of

|             |        |
|-------------|--------|
| 1 in 50     | Yes/No |
| 1 in 100    | Yes/No |
| 1 in 1,000  | Yes/No |
| 1 in 10,000 | Yes/No |

Do you think that your signed consent is a legal requirement for surgery?

---

---

CATARACT INFORMED CONSENT SURVEY

To improve our care of people intending to have cataract surgery, we wish to find out what they most want to know prior to their operation. Thank you for completing this survey.

Your details: Male  Female  Age: \_\_\_\_

Is this to be your First  or Second  cataract operation?

Regarding the information given to you before the operation:

How important is it for you to know: *(please circle)*

*Not Important/Very Important*

---

Yes/No

How would you like information about your cataract operation given?

Verbal

Yes/No

Written

Yes/No

Video

Yes/No

Internet

Yes/No

Is there any other information that you would like to know, or consider of general importance, before you undergo your cataract operation?

I choose not to answer this questionnaire

---
